# Supplementary material for: Bimetallic nanocatalysts for the conversion of muconic acid to adipic acidElectronic supplementary information (ESI) available: experimental details, EXAFS fit and refined EXAFS parameters. See http://www.rsc.org/suppdata/cc/b3/b300203a/
Source: Royal Society of Chemistry journal article supplement (doi:10.1039/b300203a), 2003-04-14
Supplement: b300203a.doc [file b300203a.doc]

# Supplementary data

# Experimental details

For test purposes we used the trans, trans- rather than the cis, cis-muconic acid, the former being much more readily available (and cheaper) than the latter.

Ru K and Pt LIII edge data were recorded at station 9.2 of the Synchrotron radiation source, Daresbury Laboratory, which operates at 2 GeV with a typical current between 150 and 250 mA. This station was equipped with Si (220) monochromator, ionisation chambers and 13-element fluorescence (Canberra) detector; data were collected using fluorescence mode. In a typical experiment, 125 mg of the Ru10Pt2 anchored cluster was made in to a pellet and loaded in to a custom built in situ cell that is capable of measuring EXAFS in both transmission and fluorescence mode. The samples were heated at 175°C (ramp rate of ca 5°C/min) for 2 hours in a vacuum (ca 1 x 10-3 atm) prior to the EXAFS measurements, performed at room temperature. The data was processed using EXCALIB, EXBROOK and EXCURV98 suite of programs available at Daresbury laboratory. The final analysis to determine the structural model was carried out using a full multiple scattering procedure, employing C1 symmetry. The starting model was based on the structure of the parent cluster compound, which consists of ruthenium, platinum, carbon and oxygen atoms. Before combining parameters together in the multiple edge refinement, best fit analyses were generated for the catalyst at both the Ru K edge and Pt LIII edge. To minimize the number of parameters in the final model, and hence stay within the limits imposed by the quantity of data, Debye-Waller factors for equivalent atoms were held the same.
